# Supplementary material for: Genome-Wide Association Study for Adult-Plant Resistance to Stripe Rust in Chinese Wheat Landraces (Triticum aestivum L.) From the Yellow and Huai River Valleys
Source: Front Plant Sci. 2019 May 16;10:596. doi: 10.3389/fpls.2019.00596 (PMC6532019; doi:10.3389/fpls.2019.00596)
Supplement: Supplementary file 1 [file Table_1.xlsx]

## Sheet: Table S1
Table S1. 152 Chinese Yellow and Huai River Valleys Wheat Zone landraces used in this study and their infection type (IT) and disease severity (DS) at adult-plant stage in five environments
No.	AS_No.a	DArT	CGRIS_No.b	Landrace name	Origin	Subgroupc	Atitude (m)	East longitude (°)	Northern Latitude (°)	Infection Type (IT)							Disease Severity (DS)
										15CZ	15MY	16CZ	16MY	17CZ	BLUP		15CZ	15MY	16CZ	16MY	17CZ	BLUP
1	AS661164	D158	ZM003495	Baihuomai	Miyang, Henan	1	861	110.167	37.7667	-	3	3	3	4	3.13158		-	40	56	6	16	33.5287
2	AS661165	D149	ZM003379	Zaobanyue	Xichuan, Henan	1	50	118.15	39.7	2	3	2	1	3	2.2143		10	10	30	5	22	18.278
3	AS661166	D146	ZM003343	ermangmai	Fangcheng, Henan	1	92	112.4	32.5167	3	3	3	3	3	2.9065		60	60	84	15	18	45.2681
4	AS661168	D509	ZM011105	Baisuizi	Feixian, Shandong	1	1100	113.417	36.2	3	4	2	4	4	3.25259		60	100	16	60	72	57.245
5	AS661169	D63	ZM001672	Louguding	Jinan, Shandong	1	-	91.95	27.9833	4	4	4	4	4	3.77174		100	100	80	100	100	86.2594
6	AS661170	D81	ZM001908	Banjiemangdabaimai	Feicheng, Shandong	2	48	116.45	35.9333	4	4	0	4	1	2.5604		100	100	3	15	2	42.4004
7	AS661171	D111	ZM002664	Baimangyouzi	Neihuang, Henan	2	83	113.383	35.3333	4	4	4	4	4	3.77174		60	100	100	28	40	60.6188
8	AS661173	D135	ZM003148	Sanyuehuang	Shanxian, Henan	2	249	112.15	34.7167	3	4	3	4	3	3.25259		40	80	54	17	12	39.5327
9	AS661174	D291	ZM006247	Hongmai	Donghai, Jiangsu	1	35	116.85	34.7333	4	3	1	4	2	2.73345		80	40	5	15	14	31.267
10	AS661176	D299	ZM006306	Hongshimai	Pixian, Jiangsu	1	46	116.283	39.9833	1	2	0	1	1	1.176		5	5	2	1	2	7.81927
11	AS661177	D571	ZM012226	Changmanghong	Shangxian, Shanxi	1	-	108.033	35.0333	3	4	4	1	4	3.07954		60	60	80	25	40	49.9914
12	AS661179	D19	ZM000392	Yulinbai	Baixiang, Hebei	2	445	129	42.55	2	3	1	4	3	2.5604		10	20	19	9	9	16.5911
13	AS661182	D106	ZM002526	Hongmangguozitou	Changqing, Shandong	2	36	116.3	35.0667	4	4	4	4	4	3.77174		80	100	80	60	56	68.7158
14	AS661183	D152	ZM003403	Baiheshangtou	Neixiang, Henan	1	170	111.85	33.05	3	3	3	3	4	3.07954		40	80	90	10	80	55.8955
15	AS661184	D154	ZM003413	Yerenmao	Neixiang, Henan	1	77	114.067	32.1167	4	4	4	3	3	3.42564		100	60	95	28	30	58.0884
16	AS661185	D290	ZM006216	Zuantoubaike	Binhai, Jiangsu	1	33	118.75	34.5167	2	3	1	1	3	2.04125		20	20	12	2	5	15.2416
17	AS661187	D42	ZM000841-B	Dahongmang	Xingtai, Hebei	2	1788	102.25	26.6667	4	3	3	1	3	2.73345		80	60	38	4	37	42.2317
18	AS661188	D79	ZM001887	Baimai	Ningyang, Shandong	2	24	116.65	39.9	1	1	1	0	2	1.176		10	5	3.75	0	10	10.1387
19	AS661190	D80	ZM001891	Baitutou	Ningyang, Shandong	2	107	116.767	36.1833	4	4	1	4	3	3.07954		100	80	5	55	20	49.1479
20	AS661191	D83	ZM001915	Hongmanghongmai	Zhangqiu, Shandong	2	9	118.117	37.15	4	3	1	1	3	2.38735		80	40	9	5	1	28.0619
21	AS661019	D108	ZM002566	Yulincao	Wenshang, Shandong	1	51	115.517	35.55	3	3	2	1	2	2.2143		40	10	17.5	14	6	20.0492
22	AS661194	D127	ZM003069	Baitiaoyu	Mixian, Henan	1	49	115.8	34.45	0	3	1	1	3	1.69515		5	40	9	5	66	26.375
23	AS661197	D138	ZM003226	Baimangcao	Queshan, Henan	1	65	114.017	33.15	1	3	1	2	3	2.04125		5	10	10	8	72	23.0012
24	AS661198	D292	ZM006260	Sanyuehuang	Peixian, Jiangsu	2	35	116.85	34.7333	1	2	0	1	3	1.5221		5	5	6	3	72	20.6396
25	AS661199	D92	ZM002182	Huomai	Yixian, Shandong	1	-	116.317	37.4333	2	3	2	3	2	2.38735		40	60	20	24	33	35.1468
26	AS661200	D112	ZM002689	Baigedatou	Xiuwu, Henan	2	268	112.433	34.65	1	1	1	1	2	1.34905		10	5	9	1	14	11.8678
27	AS661201	D118	ZM002818	ercaomai	Huaiyang, Henan	2	120	112.533	32.9833	4	3	3	4	3	3.25259		80	60	72	44	28	53.1965
28	AS661202	D123	ZM002910	Baicaomai	Yanjin, Henan	1	149	112.583	35.1	4	4	3	4	4	3.59869		80	80	64	60	80	66.6915
29	AS661203	D133	ZM003146	Lingbao925	Lingbao, Henan	1	397	111.183	34.7667	3	-	2	4	4	3.09169		60	-	32	40	80	48.8299
30	AS661204	D294	ZM006266	Youzimai	Peixian, Jiangsu	1	58	117.217	34.2333	3	4	3	4	3	3.25259		80	80	85	76	36	65.5107
31	AS661205	D297	ZM006282	Baisuibai	Tongshan, Jiangsu	1	21	117.75	33.9	4	4	3	4	4	3.59869		100	80	64	66.67	80	71.1905
32	AS661021	D303	ZM006341	Dayangxiaomai	Guanyun, Jiangsu	1	10	119.067	33.6667	3	3	2	1	3	2.38735		80	40	38	4	11	34.472
33	AS661206	D577	ZM012320	Baiyanglazi	Shanyang, Shanxi	1	320	109.367	32.85	3	3	0	1	2	1.8682		20	5	7	1	6	11.8678
34	AS661207	D101	ZM002500	Changmangbai	Laiwu, Shandong	2	60	116.8	35.7667	3	3	1	1	3	2.2143		60	40	8	5	80	37.8458
35	AS661208	D113	ZM002729	Dakoumai	Luoyang, Henan	2	750	111.6	33.7833	3	3	1	3	3	2.5604		40	80	13	36	40	40.5448
36	AS661209	D115	ZM002762	Yingsizhuang	Yichuan, Henan	1	115	113.45	34.15	3	1	1	1	2	1.69515		40	5	6	4	5	15.4102
37	AS661210	D126	ZM003011	Benyouzimai	Qingfeng, Henan	1	400	113.383	34.5333	1	2	0	1	2	1.34905		5	10	1	2	1	8.49402
38	AS661211	D130	ZM003109	Baimangbai	Shenqiu, Henan	2	45	114.85	33.7167	3	3	0	4	1	2.2143		60	40	6	15	6	26.7124
39	AS661212	D131	ZM003110	Tutoumai	Huaiyang, Henan	1	268	112.433	34.65	3	3	0	3	3	2.38735		60	10	5	8	52	28.0619
40	AS661215	D134	ZM003147	Gedatou	Shanxian, Henan	1	397	111.183	34.7667	3	1	1	2	3	2.04125		40	5	12	10	56	26.0376
41	AS661216	D136	ZM003159	Gedasuihongmai	Xinan, Henan	2	95	114.05	32.8	3	2	1	2	3	2.2143		60	60	7	3	60	37.3397
42	AS661217	D293	ZM006263	Xiaolihong	Peixian, Jiangsu	2	35	116.85	34.7333	0	1	0	0	2	0.829907		5	5	5	0	12	9.84353
43	AS661023	D300	ZM006318	Xiaohongmai	Donghai, Jiangsu	1	15	118.717	33.7	3	3	0	4	3	2.5604		80	40	1	52	68	45.9429
44	AS661219	D511	ZM011140	Baimanghong	Xihua, Henan	1	68	112.75	32.15	3	3	1	3	4	2.73345		10	20	8	5	80	26.0376
45	AS661220	D574	ZM012268	Bailanmai	Zuoshui, Shanxi	1	705	109.95	33.9167	3	3	0	1	3	2.04125		60	20	5	0	52	28.3993
46	AS661221	D12	ZM000193	Xiaobaimang	Wuyi, Hebei	2	184	111.5	33.1333	4	4	4	4	4	3.77174		100	100	100	60	76	78.8371
47	AS661222	D13	ZM000236	Youzimai	Zaoqiang, Hebei	2	42	115.067	33.3833	4	4	4	4	4	3.77174		100	80	100	25	80	70.234
48	AS661223	D41	ZM000837	Honghulubaimai	Xingtai, Hebei	2	338	104.517	28.4333	3	3	1	1	2	2.04125		20	40	8	5	18	20.6396
49	AS661224	D71	ZM001785	Hongmangxiaomai	Wendeng, Shandong	1	-	91.6667	29.05	2	1	1	2	1	1.5221		10	5	35	2	8	15.4102
50	AS661225	D73	ZM001797	Laohongtuxiaomai	Haiyang, Shandong	2	135	120.85	37.3	3	3	2	1	2	2.2143		80	40	28	2	26	34.9781
51	AS661228	D82	ZM001910	Mazhatoumai	Dongping, Shandong	2	66	117.517	36.7167	2	1	0	1	2	1.34905		20	5	2	1	8	11.3617
52	AS661229	D103	ZM002510	Jinmai	Dongping, Shandong	2	48	116.45	35.9333	3	4	4	4	3	3.42564		80	80	100	7	48	58.4258
53	AS661230	D114	ZM002752	Cantiaomai	Luanchuan, Henan	1	200	112.417	34.4167	3	3	4	4	3	3.25259		80	60	100	10	64	58.2571
54	AS661231	D122	ZM002906	Dabaimai	Yanjin, Henan	2	73	114.183	35.1333	3	4	0	4	3	2.73345		80	80	4	40	80	53.1965
55	AS661232	D124	ZM002953	Mazhamai	Jiyuan, Henan	1	149	112.583	35.1	1	4	0	4	2	2.2143		5	60	4	6	8	19.2901
56	AS661233	D125	ZM002955	Xiaofoshou	Jiyuan, Henan	1	49	115.117	35.9	2	1	0	0	2	1.176		20	5	4	0	5	11.0243
57	AS661234	D139	ZM003233	Dalihong	Suiping, Henan	1	13	116.117	38.1833	1	0	3	4	2	2.04125		5	0	76.25	80	13	34.6829
58	AS661239	D141	ZM003256	Youzitou	Shangcai, Henan	1	73	114.267	33.2667	0；	2	1	1	2	1.176		0	5	3	1	17	9.67484
59	AS661027	D143	ZM003284	Benmai	Runan, Henan	1	46	114.983	32.7333	0	1	1	0	2	1.00296		0	5	4	0	18	9.84353
60	AS661252	D150	ZM003390	Baicantiao	Xixia, Henan	1	170	111.85	33.05	3	3	1	4	1	2.38735		40	40	12	9	4	23.0012
61	AS661253	D151	ZM003400	Zhuaziya	Neixiang, Henan	1	170	111.85	33.05	0	1	0	0；	1	0.483808		5	5	0	0	5	7.81927
62	AS661254	D166	ZM003837	Dapushanba	Danfeng, Shanxi	1	705	109.95	33.9167	1	2	1	1	2	1.5221		40	5	10	2	32	20.3022
63	AS661256	D168	ZM003887	Daqimai	Shangxian, Shanxi	1	960	106.517	33.9167	1	3	1	1	3	1.8682		10	5	7	4	28	14.3981
64	AS661258	D171	ZM004065	yu'ermai	Nanzheng, Shanxi	1	500	109.583	34.95	1	1	1	0	2	1.176		5	5	4	0	28	12.3739
65	AS661030	D296	ZM006275	Baiyouzi	Tongshan, Jiangsu	1	58	117.217	34.2333	0	2	1	0；	1	0.829907		5	5	3	0	7	8.66271
66	AS661033	D508	ZM011098	Guangzongxiaomai	Linqing, Shandong	2	103	117.95	35.25	3	3	1	1	2	2.04125		60	10	7	4	15	21.483
67	AS661034	D573	ZM012251-B	Shisanmai	Danfeng, Shanxi	1	820	109	33.6667	0	1	0	0	1	0.656858		5	5	0	0	0	6.97583
68	AS661037	D579	ZM012332	Baiwugongcao	Shangnan, Shanxi	1	590	110.833	35.4167	2	1	2	0	2	1.5221		40	5	12	1	27	19.6275
69	AS661038	D599	ZM012745	Deguolan	Zuoshui, Shanxi	1	39	116.6	40.1333	2	3	2	4	4	2.9065		40	60	12	40	52	39.7014
70	AS661041	D22	ZM000419	Dabaimai	Xingtang, Hebei	2	2312	97.55	39.8	4	3	3	4	4	3.42564		100	60	84	22	100	67.0289
71	AS661042	D36	ZM000721	Hongmangbai	Jiaohe, Hebei	2	95	118.517	28.8833	3	3	3	1	3	2.5604		60	20	40	6	64	37.3397
72	AS661435	D38	ZM000754	Baimangmai	Jixian, Hebei	2	598	113.683	25.5667	3	3	2	3	3	2.73345		60	80	22	8	56	43.4125
73	AS661436	D43	ZM000857	Baikebai	Ningjin, Hebei	2	375	105.7	29.7167	4	3	4	4	4	3.59869		100	60	100	56	100	75.4633
74	AS661439	D75	ZM001818	Hongmangmai	Weixian, Shandong	2	-	-	-	3	3	4	4	4	3.42564		80	60	70	26.25	100	62.0104
75	AS661440	D104	ZM002514	Luanrangxian	Dongping, Shandong	2	48	116.45	35.9333	3	1	2	1	4	2.2143		60	20	24	3	100	40.2075
76	AS661441	D137	ZM003222	Baimai	Queshan, Henan	1	95	114.05	32.8	0；	1	0	1	1	0.656858		0	5	0	1	6	7.3132
77	AS661442	D140	ZM003252	Hongmanghong	Xiping, Henan	1	73	114.267	33.2667	1	1	1	1	2	1.34905		5	10	4	3	40	15.7476
78	AS661443	D142	ZM003267	Zihuatou	Shangcai, Henan	1	49	114.35	33	0；	1	0	0；	3	0.656858		0	5	0	0	45	13.7234
79	AS661444	D155	ZM003438	Xiaozihong	Xinyang, Henan	1	52	115.683	32.1833	0	1	1	1	4	1.5221		0	5	3	1	68	18.278
80	AS661446	D597	ZM012727	Hulutou	Shanyang, Shanxi	1	322	110.117	32.8167	2	1	1	1	4	1.8682		10	5	12.5	2	64	21.0613
81	AS661447	D611	ZM017496	Dabailing(Pingyuan40)	Yuanshulu, Hebei	2	23	115.9	37.7833	3	3	3	4	3	3.07954		60	60	13	7	26	33.2912
82	AS661449	D614	ZM017573	Shenxianmiao	Cangxian, Hebei	2	-	111.25	35.8333	4	3	4	4	4	3.59869		80	80	52	44	80	61.9683
83	AS661450	D18	ZM000326	Gongxianmai	Jinxian, Hebei	2	800	109.5	35.25	4	3	4	4	4	3.59869		100	60	80	60	80	69.3906
84	AS661062	D23	ZM000420	Dabailing	Xinle, Hebei	2	2835	102.267	35.1	4	3	4	4	4	3.59869		100	40	80	60	100	69.3906
85	AS661069	D25	ZM000448-B	Xiaobaipi	Jinxian, Hebei	2	5	120.267	31.55	4	3	4	4	4	3.59869		100	60	80	48	100	70.7401
86	AS661071	D44	ZM000880	Baihulutou	Guangzong, Hebei	2	161	108.9	30.9667	4	3	4	4	4	3.59869		100	80	80	55	100	75.2947
87	AS661072	D105	ZM002515	Dabaimang	Dongping, Shandong	2	40	116.5	36.2333	3	3	4	1	3	2.73345		80	20	44	6	72	42.7378
88	AS661073	D116	ZM002778	Xiaozibai	Yuxian, Henan	2	147	113.317	32.7167	2	3	1	0	2	1.69515		40	20	13	0	11	19.4588
89	AS661074	D129	ZM003098	Wuhuatou	Minquan, Henan	1	24	115.75	37.5	3	3	4	3	3	3.07954		80	40	68	12	64	49.8227
90	AS661075	D144	ZM003299	Baisuibai	Pingyu, Henan	2	158	113	33.2667	0	1	0	0	1	0.656858		5	5	1	0	3	7.65058
91	AS661076	D145	ZM003338	Qumangmai	Fangcheng, Henan	1	158	113	33.2667	2	2	1	0	2	1.5221		40	10	4	0	26	18.784
92	AS661078	D683	ZM020073	Xiaohongmang	Fengxian, Jiangsu	1	34	117.233	34.2667	3	3	4	2	3	2.9065		80	40	100	8	72	55.8955
93	AS661079	D14	ZM000251	Wuhuatou	Xianxian, Hebei	2	62	114.017	33.4	4	3	4	3	3	3.25259		100	20	80	16	64	52.5217
94	AS661080	D66	ZM001718	Banmangmai	Boshan, Shandong	2	-	89.7167	28.5833	3	3	4	4	4	3.42564		60	40	72	10	80	49.4853
95	AS661722	D67	ZM001764	Zijielumai	Jimo, Shandong	2	-	87.0667	28.6167	2	1	4	1	4	2.38735		20	5	12	4	80	25.7002
96	AS661723	D76	ZM001819	Xiaohongmang	Weixian, Shandong	2	55	119.917	36.75	4	3	4	1	4	3.07954		80	60	80	5	76	56.0642
97	AS661724	D78	ZM001863	Xiaobiansui	Anqiu, Shandong	2	60	116.8	35.7667	2	1	3	1	4	2.2143		10	5	10	5	60	20.4709
98	AS661725	D90	ZM002145	Baikangyangmai	Qingdao, Shandong	1	91	117.967	36.65	3	2	2	1	3	2.2143		60	5	8	1	5	18.6153
99	AS661726	D93	ZM002195	Yejiling	Deping, Shandong	1	24	116.367	37.1667	3	3	4	4	4	3.42564		60	60	76	36	80	57.9197
100	AS661809	D107	ZM002561	Kaoshanhong	Jinxiang, Shandong	1	43	116.467	35.7167	1	1	1	0	1	1.00296		10	10	7	0	4	10.5183
101	AS661812	D117	ZM002790	Datouben	Miyang, Henan	1	45	114.85	33.7167	1	3	1	0	4	1.8682		5	5	2	0	48	15.4102
102	AS661814	D132	ZM003123	Laochushanbao	Luoyang, Henan	1	406	110.867	34.5167	2	3	2	0	4	2.2143		40	40	4	0	80	32.9538
103	AS661815	D153	ZM003405	Hongquanmang	Neixiang, Henan	1	170	111.85	33.05	3	3	2	4	4	3.07954		80	10	18	20	88	41.7256
104	AS661817	D302	ZM006340	Daliuleng	Guanyun, Jiangsu	1	4	119.25	34.3833	3	1	3	3	4	2.73345		80	10	22	4	100	41.7256
105	AS661819	D613	ZM017559	Shulu2Hao	Yuanshulu, Hebei	2	10	116.917	38.3333	3	3	4	4	4	3.42564		60	20	48	18.75	100	46.9128
106	AS661823	D37	ZM000743	Hongmangmai	Zaoqiang, Hebei	2	151	120.067	28.65	3	3	4	4	4	3.42564		80	80	76	36	92	66.6915
107	AS661826	D40	ZM000802	Gaochan1Hao	Ningjin, Hebei	2	635	108.133	32.0833	3	3	3	3	4	3.07954		60	20	7	8	96	37.5084
108	AS661851	D65	ZM001700	Jinbaoyu	Yixian, Shandong	2	-	91.3667	29.6667	2	1	1	0	4	1.69515		40	10	5	0	100	31.4357
109	AS661855	D84	ZM001945	Xiaobaimangmai	Boxing, Shandong	2	24	116.367	37.1667	1	1	1	0	3	1.34905		5	5	4	0	64	18.4466
110	AS661880	D96	ZM002372	Laiyangzhuang	Fushan, Shandong	2	15	122.4	37.1667	4	3	2	3	4	3.07954		80	20	10	7	100	41.8943
111	AS661881	D98	ZM002429	Xiaohongmangliangmai	Jimo, Shandong	2	36	120.517	37.65	3	3	1	0	3	2.04125		60	40	5	0	52	31.773
112	AS661882	D120	ZM002847	Pushanbamai	Xichuan, Henan	1	100	113.633	34.7833	0	1	1	0	1	0.829907		5	5	2	0	5	8.15665
113	AS661885	D121	ZM002862	Huangguaxian	Zhengzhou, Henan	2	73	114.183	35.1333	0	0	1	0	1	0.656858		5	0	2	0	6	7.48189
114	AS661117	D128	ZM003075	Benhulutou	Shangqiu, Henan	1	62	115.133	34.65	0	1	1	0	1	0.829907		5	5	2	0	5	8.15665
115	AS661118	D26	ZM000452	Liulengmai	Jinxian, Hebei	2	6	119.8	31.3667	4	3	4	4	4	3.59869		100	60	80	32.5	100	68.1254
116	AS661119	D39	ZM000772	Guchengxiaomai	Gucheng, Hebei	2	4	113.2	23.3667	4	3	4	4	4	3.59869		80	40	80	30	96	60.2814
117	AS661120	D85	ZM001980	Baihulutou	Enxian, Shandong	2	40	116.1	35.8	2	1	1	0	1	1.176		10	5	3	0	3	8.8314
118	AS661122	D295	ZM006267	Tutoumai(Jia)	Tongshan, Jiangsu	1	58	117.217	34.2333	2	1	1	1	1	1.34905		10	5	2	1.25	1	8.53619
119	AS661123	D612	ZM017516	Xiaohongmang	Wuyi, Hebei	2	-	115.217	37.9167	4	3	4	4	4	3.59869		80	80	48	60	80	63.9925
120	AS662012	D20	ZM000393	Daheshangtou	Handan, Hebei	2	-	113.867	40.8667	4	3	4	1	3	2.9065		80	40	60	5	36	42.5691
121	AS662013	D35	ZM000703	Hongtutou	Mengcun, Hebei	1	60	119.917	28.45	0	1	1	0；	1	0.656858		5	5	0	0	3	7.48189
122	AS661124	D87	ZM002027	Baikumai	Liangshan, Shandong	2	36	116.3	35.0667	3	3	4	1	4	2.9065		60	10	64	3	80	41.8943
123	AS661125	D95	ZM002224	Bimangbai	Jiyang, Shandong	2	7	121.267	37.5	4	3	4	3	4	3.42564		80	40	46	9	72	46.955
124	AS661126	D684	ZM020082	Honghulutoubaimai	Xuzhou, Jiangsu	2	920	110.45	31.1	2	3	4	3	4	3.07954		20	20	48	2	92	35.9902
125	AS661127	D97	ZM002409	Shidaosankemang	Rongcheng, Shandong	1	26	120.45	36.3833	2	2	1	1	2	1.69515		10	20	9	5	5	13.5547
126	AS661128	D88	ZM002073	Hongchoumai	Jinxiang, Shandong	1	39	117.067	36.6833	1	0	0	0	1	0.656858		5	0	0	0	5	6.97583
127	AS661129	D94	ZM002199	Yazizui	Pingyuan, Shandong	1	20	117.2	36.9667	3	1	0	0	1	1.176		60	0	1	0	4	16.2537
128	WH025	D109	ZM002586	Choumai	Juancheng, Shandong	2	3	117.817	39.3333	3	1	0	1	3	1.69515		60	0	1	1	9	17.2658
129	AS661130	D119	ZM002828	Kumai	Nanyang, Henan	1	23	115.9	37.7833	1	0	0	0	2	0.829907		5	0	0	0	15	8.66271
130	AS661131	D507	ZM011097	Xiaoyouzimai	Zhucheng, Shandong	1	33	115.7	36.8333	1	0	0	0	0；	0.310759		10	0	0	0	0	6.97583
131	AS661132	D100	ZM002492	Baitumai	Zhangqiu, Shandong	2	190	117.65	36.25	4	3	1	3	1	2.38735		100	20	2	3	2	26.7124
132	AS661134	D110	ZM002618	Dongmai	Donga, Shandong	2	51	114.917	35.9333	3	0	4	1	1	1.8682		60	0	12	0	16	20.1335
133	AS661136	D16	ZM000294	Xiaomaimang	Shulu, Hebei	2	803	110.067	36.5833	4	3	4	3	4	3.42564		100	40	56	13	100	57.4137
134	AS661137	D89	ZM002136	Bailouguding	Licheng, Shandong	1	2	117.65	39.0167	3	0	4	1	4	2.38735		60	0	5	0	64	27.0498
135	AS661138	D169	ZM003965	Gouweibabaimai	Fengxian, Shanxi	1	70	114.583	38.15	0；	0	0	0；	0；	0		0	0	0	0	0	5.28894
136	AS661139	D576	ZM012306	baiyu'ermai	Foping, Shanxi	1	684	109.867	33.5167	3	0	1	1	3	1.69515		60	0	0	1	37	21.8204
137	AS661140	D69	ZM001772	Hongkangbai	Rongcheng, Shandong	2	2255	100.85	27.3	3	1	1	1	3	1.8682		60	5	9	5	40	25.3629
138	AS661141	D99	ZM002438	Piaoxiao	Huangxian, Shandong	2	-	-	-	4	3	4	3	4	3.42564		100	20	52	5	62	45.6055
139	AS661143	D102	ZM002504	hongduomai	Ningyang, Shandong	2	48	116.45	35.9333	4	3	4	4	4	3.59869		100	40	32	8	100	52.5217
140	AS661145	D510	ZM011114	Yejihong	Qingyun, Shandong	2	52	114.517	33.7833	4	1	4	2	3	2.73345		100	5	68	3	30	40.0388
141	AS661147	D31	ZM000652	Baixiaomai	Cangxian, Hebei	2	4	121.383	31.6167	3	3	4	3	4	3.25259		60	10	64	4	68	40.0388
142	AS661148	D64	ZM001696	Qimai	Longkou, Shandong	1	-	94.3833	29.5667	4	4	3	3	4	3.42564		100	80	10	8	100	55.5581
143	AS661149	D70	ZM001783	Biansui	Wendeng, Shandong	2	-	91.7833	29.2167	1	0	0	0；	2	0.656858		5	0	1	0	22	10.0122
144	AS661150	D72	ZM001792	Baiguangtou	Mouping, Shandong	2	30	121.033	36.7833	3	1	3	0；	2	1.69515		60	5	7	0	22	21.1457
145	AS661151	D74	ZM001801	Xiaogongxian	Qixia, Shandong	2	-	-	-	4	3	4	0	4	2.9065		100	60	27	0	100	53.7025
146	AS661152	D77	ZM001823	Baishamai	Pingdong, Shandong	2	-	-	-	4	1	4	2	4	2.9065		100	5	48	5	68	43.4125
147	AS661153	D91	ZM002177	Hongheshang	Zichuan, Shandong	2	-	117.8	34.7667	3	1	1	0	4	1.8682		60	10	4	0	84	31.9417
148	AS661156	D167	ZM003873	Liulengmai	Luonan, Shanxi	1	705	109.95	33.9167	0	0	0	0	1	0.483808		0	0	0	0	2	5.62632
149	AS661159	D575	ZM012276	Baiximai	Shangxian, Shanxi	1	820	107.983	33.5333	3	0	4	0	2	1.8682		60	0	5	0	3	16.7598
150	AS661160	D582	ZM012346	Lanmai	Lueyang, Shanxi	1	570	109.15	32.4333	0	0	0	0	2	0.656858		0	0	0	0	13	7.48189
151	AS661162	D68	ZM001768	bo’erqing	Jimo, Shandong	2	-	89.6167	28.9167	3	1	3	1	4	2.38735		80	5	5	1	40	27.3871
152	AS661163	D742	-	Baituzitou	Shangdong	2	-	-	-	3	3	4	3	4	3.25259		80	40	52	5	100	52.0156
a Germplasm Resource;
b Chinese National Crop Germplasm resource platform number;
c Grouping by genotypic data using STRUCTURE v.2.3.4.
"-" data unavailable
