# Supplementary material for: Genome-Wide Association Study for Adult-Plant Resistance to Stripe Rust in Chinese Wheat Landraces (Triticum aestivum L.) From the Yellow and Huai River Valleys
Source: Front Plant Sci. 2019 May 16;10:596. doi: 10.3389/fpls.2019.00596 (PMC6532019; doi:10.3389/fpls.2019.00596)
Supplement: Supplementary file 4 [file Table_4.xlsx]

## Sheet: Sheet1
Table S4. Putative QTL associated (P values < 0.05) with IT and/or DS in four or more environments as well as the BLUPs at the adult-plant stages.
QTL	Marker	position(cM)a	chromosomea	Trial	PVE	-log（p）	Marker-trait association signifcant level						Marker interval	mapName	References
							15CZ	15MY	16CZ	16MY	17CZ	BLUP
QDS.sicau-2A	3533777	8.25971	2A	DS	4.22%-10.04%	1.36-3.12	*	***	*	NA	*	**	-	-	-
QIT.sicau-2B.1	1128976	1.59488	2B	IT	3.07%-4.60%	1.54-2.03	*	*	NA	*	*	*	wPt-6271-wPt-5738	QYr.Orr-2BS	Jighly et al. 2015
QDS.sicau-3B	3948788	134.572	3B	DS	4.29%-7.11%	1.37-2.24	*	*	*	*	NA	*	-	-	-
QIT.sicau-5B	3937445	66.0587	5B	IT	4.01%-9.12%	1.34-2.92	*	*	*	**	*	**	wPt-3661-wPt-2707	QYr.sun-5B	Bariana et al. 2010
QDS.sicau-5D	980334	118.39	5D	DS	4.36%-9.13%	1.39-2.85	*	*	*	**	NA	*	-	-	-
QIT.sicau-6A	1032504	8.31449	6A	IT	4.00%-8.35%	1.31-2.69	**	NA	*	*	*	**	wPt-671561-wPt-7840	QYr.uga-6AS	Hao et al. 2011
QDS.sicau-6A.3	3955268	87.6037	6A	DS	4.09%-9.29%	1.87-3.57	*	**	NA	***	**	***	-	-	-
QDS.sicau-6D.1	1109181	53.2648	6D	DS	5.27%-8.19%	1.67-2.61	*	*	NA	*	*	**	Xgwm325-Xbarc175	QYr.ufs-6D	Agenbag et al. 2012
QDS.sicau-7A	3064693	11.077	7A	DS	4.81%-7.78%	1.56-2.44	*	*	*	**	NA	**	-	-	-
QDS.sicau-7A.2	1250999	41.8877	7A	DS	4.92%-10.60%	1.59-3.28	*	*	**	***	NA	***	Xbarc127-Xbarc174	QYr.caas-7AS	Ren et al. 2012
QYr.sicau-1D	1022670	46.8309	1D	IT	4.61%-10.63%	1.48-3.53	*	*	**	NA	***	***	Xwmc432-Xgdm33.2	QYrdr.wgp-1DS.1	Hou et al. 2015
	Xgwm337	-	1D	DS	2.69%-7.44%	1.35-3.02	***	**	*	*	NA	*
QYr.sicau-4B.1	3022885	32.6307	4B	IT	4.08%-10.61%	1.31-3.28	**	***	*	*	NA	**	-	-	-
				DS	4.20%-7.34%	1.34-2.34	*	*	*	NA	**	*
	2292362	32.6307	4B	IT	4.47%-7.82%	1.45-2.50	*	*	NA	NA	*	**
				DS	3.52%-12.48%	1.41-3.82	*	***	*	*	*	***
QYr.sicau-4B.2	1218468	78.1788	4B	IT	4.53%-7.73%	1.44-2.49	NA	*	NA	*	*	**	-	-	-
				DS	4.65%-10.67%	1.48-3.30	NA	*	*	***	**	**
	1096092	78.1788	4B	IT	4.12%-10.39%	1.60-3.31	*	*	**	*	**	***
				DS	4.13%-10.42%	1.34-3.28	*	*	*	*	**	***
QYr.sicau-7D	3937237	12.4144	7D	IT	4.27%-10.13%	1.39-3.20	***	*	NA	NA	NA	*	-	-	-
				DS	6.24%-12.82%	2.02-4.03	***	***	*	**	NA	***
a Wheat consensus map version 4.0 (https:/www.diversityarrays.com/technology-and-resources/genetic-maps/)
PVE, phenotypic variation explained
NA, not applicable
"-",not
Yellow filled indicates the new additional loci
* represents P < 0.05, ** represents P < 0.005; *** represents P < 0.001; NA means not applicable
Signifcantly ( P < 0.005) associated with IT and/or DS in two or more environments as well as the BLUPs at the adult stages
